# Supplementary material for: Liquid crystalline poly(propylene imine) dendrimer-based iron oxide nanoparticles
Source: Royal Society of Chemistry journal article supplement (doi:10.1039/c9ra03732b), 2019-01-01
Supplement: c9ra03732b1.pdf [file c9ra03732b1.pdf]

## Supporting Information

Liquid crystalline poly(propylene imine) dendrimer-based iron oxide nanoparticles

Gruzdev M.S., Chervonova U.V., Vorobeva V.E., Ksenofontov A.A., Kolker A.M.

Table SI 1

### Conditions of DENPs synthesis

| Compound                                                | Reagents, mg (mmol)                                                                                                                     | Solvent, V, ml                | T, °C | $\tau$ , h | Yield, % |
|---------------------------------------------------------|-----------------------------------------------------------------------------------------------------------------------------------------|-------------------------------|-------|------------|----------|
| D1-K2.10-(Fe <sub>2</sub> O <sub>3</sub> ) <sub>y</sub> | 1-K2.10-(FeCl <sub>3</sub> ) <sub>1.8</sub> ,<br>200 (0.1)<br>N <sub>2</sub> H <sub>2</sub><br>96 (30)<br>NaOH,<br>60 (15)              | THF, 40<br><br>O <sub>2</sub> | 23    | 4.5        | 78.7     |
| D2-K2.10-(Fe <sub>2</sub> O <sub>3</sub> ) <sub>y</sub> | 2-K2.10-(FeCl <sub>3</sub> ) <sub>4.7</sub> ,<br>200 (0.049)<br>N <sub>2</sub> H <sub>2</sub><br>80.53 (27.53)<br>NaOH,<br>55.8 (13.4)  | THF, 50<br><br>O <sub>2</sub> | 23    | 4.5        | 58.3     |
| D3-K2.10-(Fe <sub>2</sub> O <sub>3</sub> ) <sub>y</sub> | 3-K2.10-(FeCl <sub>3</sub> ) <sub>9.2</sub> ,<br>400 (0.048)<br>N <sub>2</sub> H <sub>2</sub><br>72.53 (17.84)<br>NaOH,<br>50.64 (11.8) | THF, 55<br><br>O <sub>2</sub> | 23    | 4.5        | 47.9     |
| D4-K2.10-(Fe <sub>2</sub> O <sub>3</sub> ) <sub>y</sub> | 4-K2.10-(FeCl <sub>3</sub> ) <sub>21.1</sub> ,<br>200 (1.02)<br>N <sub>2</sub> H <sub>2</sub><br>64.06 (20.02)<br>NaOH,<br>40 (10.1)    | THF, 57<br><br>O <sub>2</sub> | 23    | 4.5        | 38.7     |

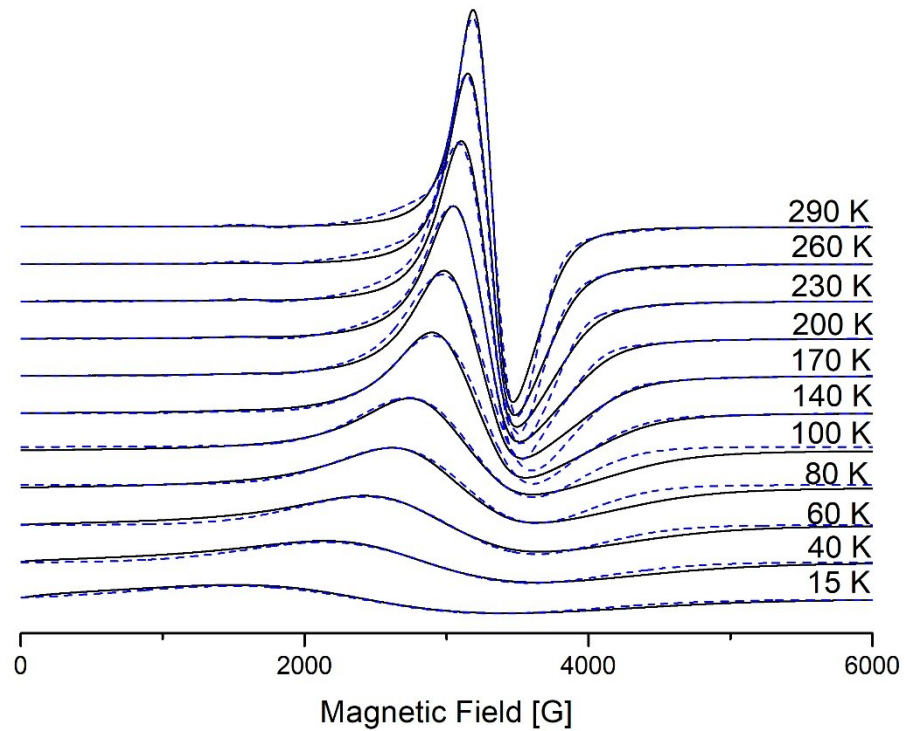

Figure 1 SI. Temperature dependence of EPR spectra for  $\gamma$ -Fe<sub>2</sub>O<sub>3</sub> NPs encapsulated into the first generation dendrimer. All spectra were recorded under the same conditions. Dashed lines show the theoretical EPR spectra simulated by EasySpin Matlab.

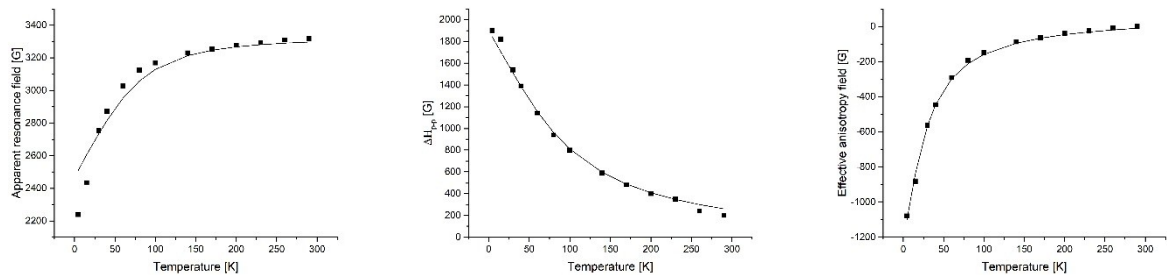

Figure 2 SI. Temperature dependences of  $H_{\text{res}}$  (a) and  $\Delta H_{\text{p-p}}$  (b) and  $H_a(T)$  (c) for I-type Fe(III) centers for  $\gamma$ -Fe<sub>2</sub>O<sub>3</sub> NPs in the first generation dendrimer. The solid line (a,b) shows the theoretical dependence simulated by BK theory given by Equations (5) and (7) for (a) and (b), respectively. The solid line (c) shows the theoretical dependence simulated by RS theory.

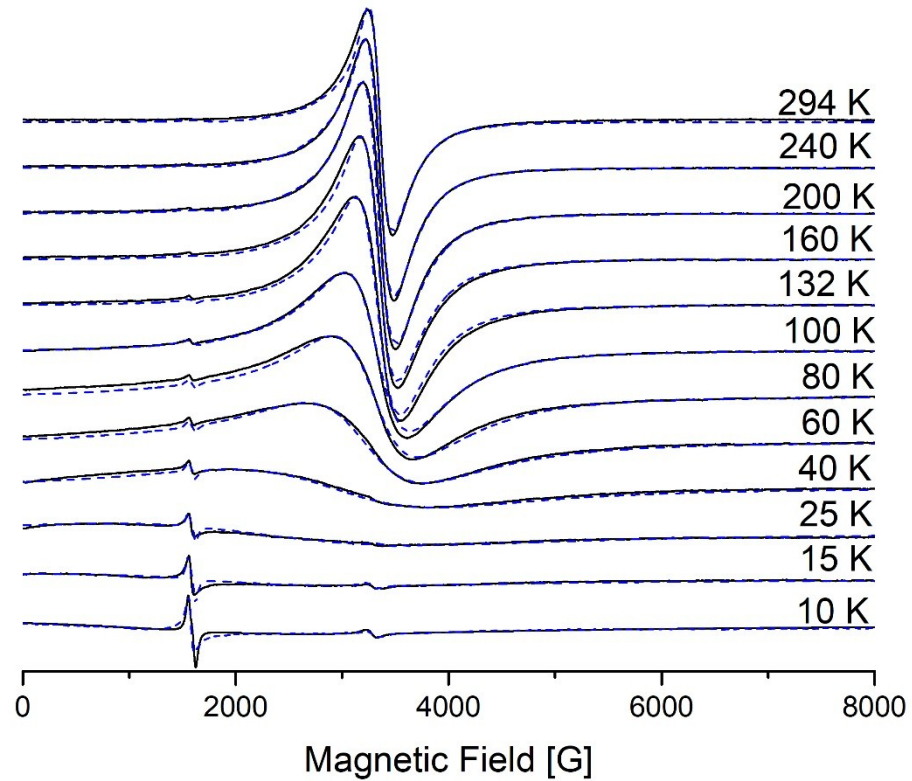

Figure 3 SI. Temperature dependence of EPR spectra for  $\gamma$ -Fe<sub>2</sub>O<sub>3</sub> NPs encapsulated into the third generation dendrimer. All spectra were recorded under the same conditions. Dashed lines show the theoretical EPR spectra simulated by EasySpin Matlab.

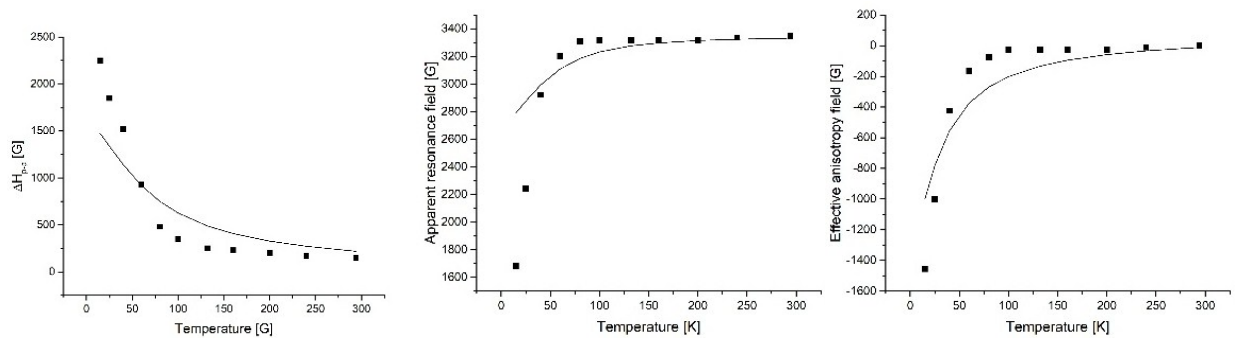

Figure 4 SI. Temperature dependences of  $H_{\text{res}}$  (a) and  $\Delta H_{\text{p-p}}$  (b) and  $H_a(T)$  (c) for I-type Fe(III) centers for  $\gamma$ -Fe<sub>2</sub>O<sub>3</sub> NPs in the third generation dendrimer. The solid line (a,b) shows the theoretical dependence simulated by BK theory given by Equations (5) and (7) for (a) and (b), respectively. The solid line (c) shows the theoretical dependence simulated by RS theory.
